# Supplementary material
Source: publisher figshare collection journal article supplement (https://karger.figshare.com/ndownloader/files/22459880)
Supplement: Supplementary file 1 [file 22459880]

Supplementary Figure 1; Consort Figure of flow of patients through Iron and Heart Trial

Failed screening or Ineligible or declined

N=147

**2 missed final visit**

**1 withdrew because of symptoms**

**1 withdrew before the baseline visit**

randomized

n=55
